# Supplementary material
Source: publisher figshare collection journal article supplement (https://sage.figshare.com/ndownloader/files/15086216)
Supplement: Supplementary file 1 [file 15086216]

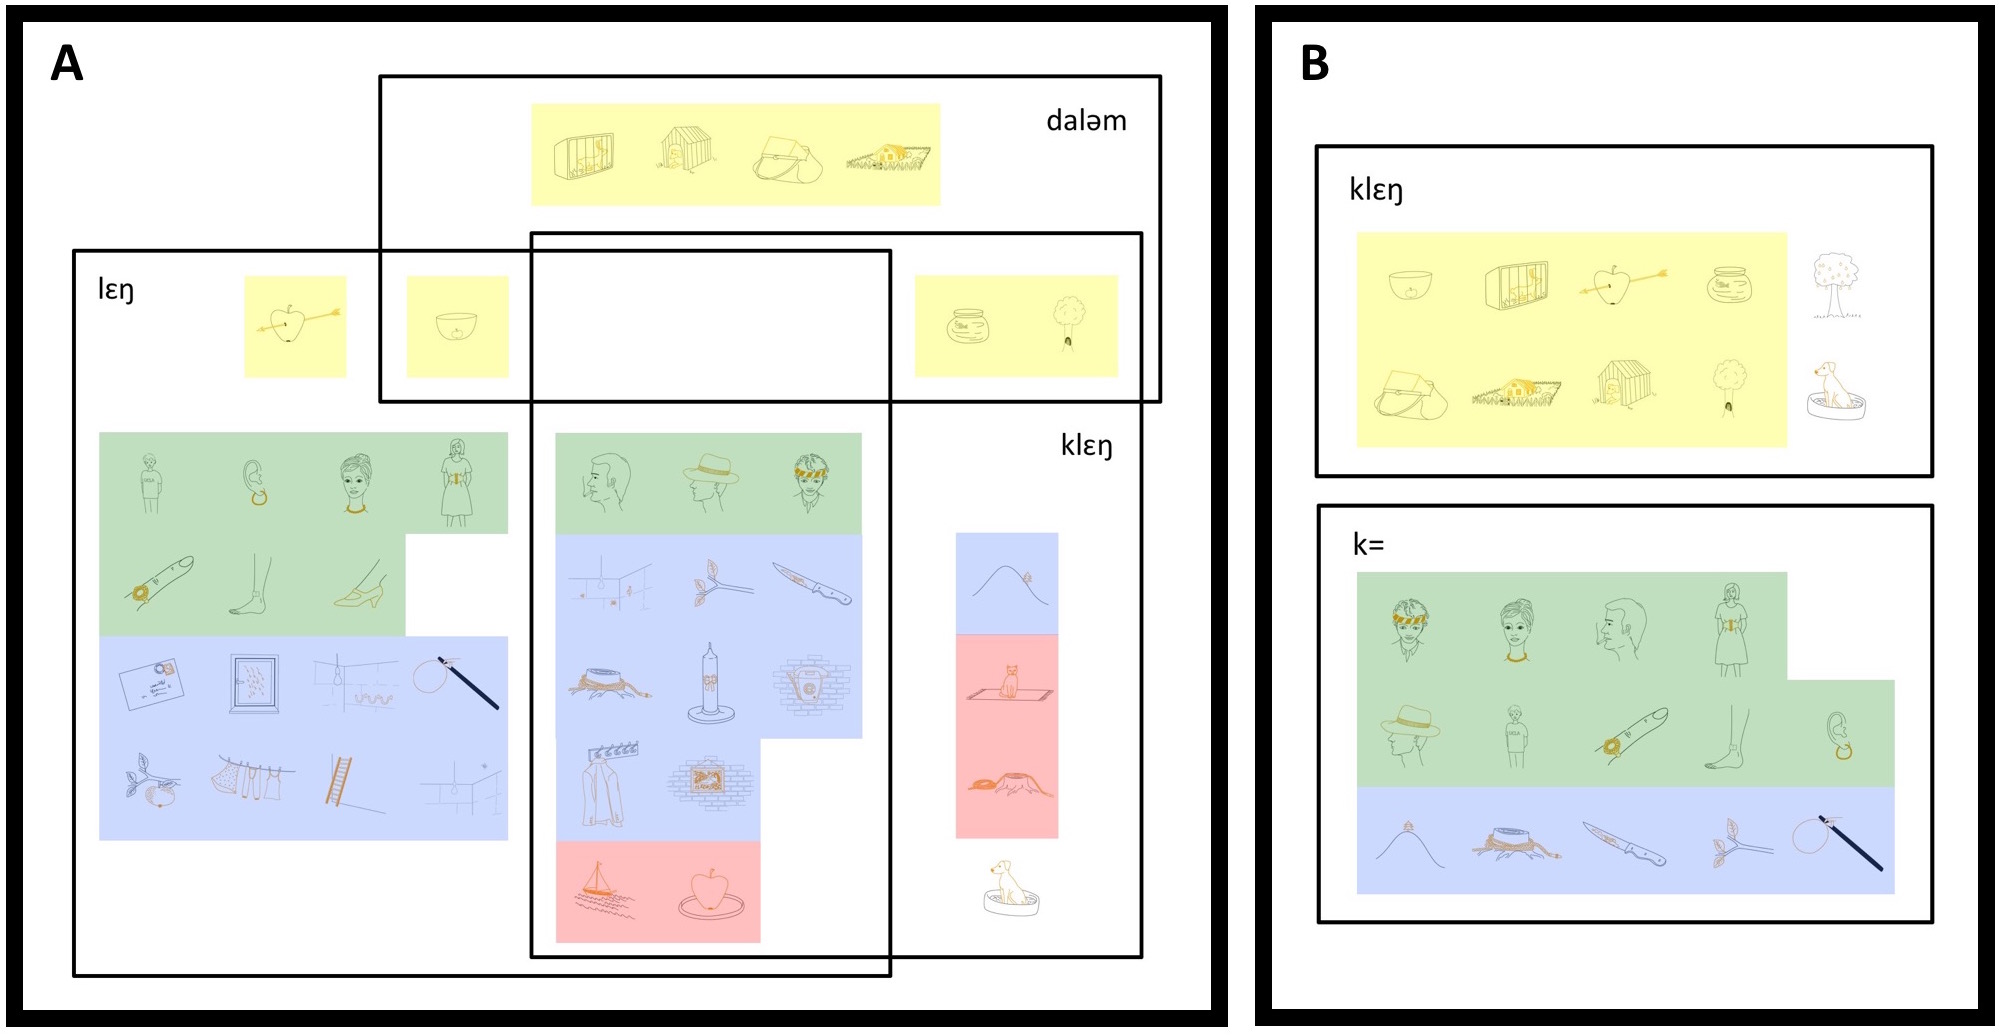


**Figure 2A. Extension map of the use of *klɛŋ*, *lɛŋ* and *daləm* by the Jedek monolinguals. Figure 2B. Extension map of the use of *klɛŋ* and *k=* by the Jahai monolinguals.** Yellow=containment scenes; green=body-part-as-Ground scenes; blue=attachment scenes; red=superjacent scenes. Lines indicate scenes labeled with a TRM by more than 33% of speakers.


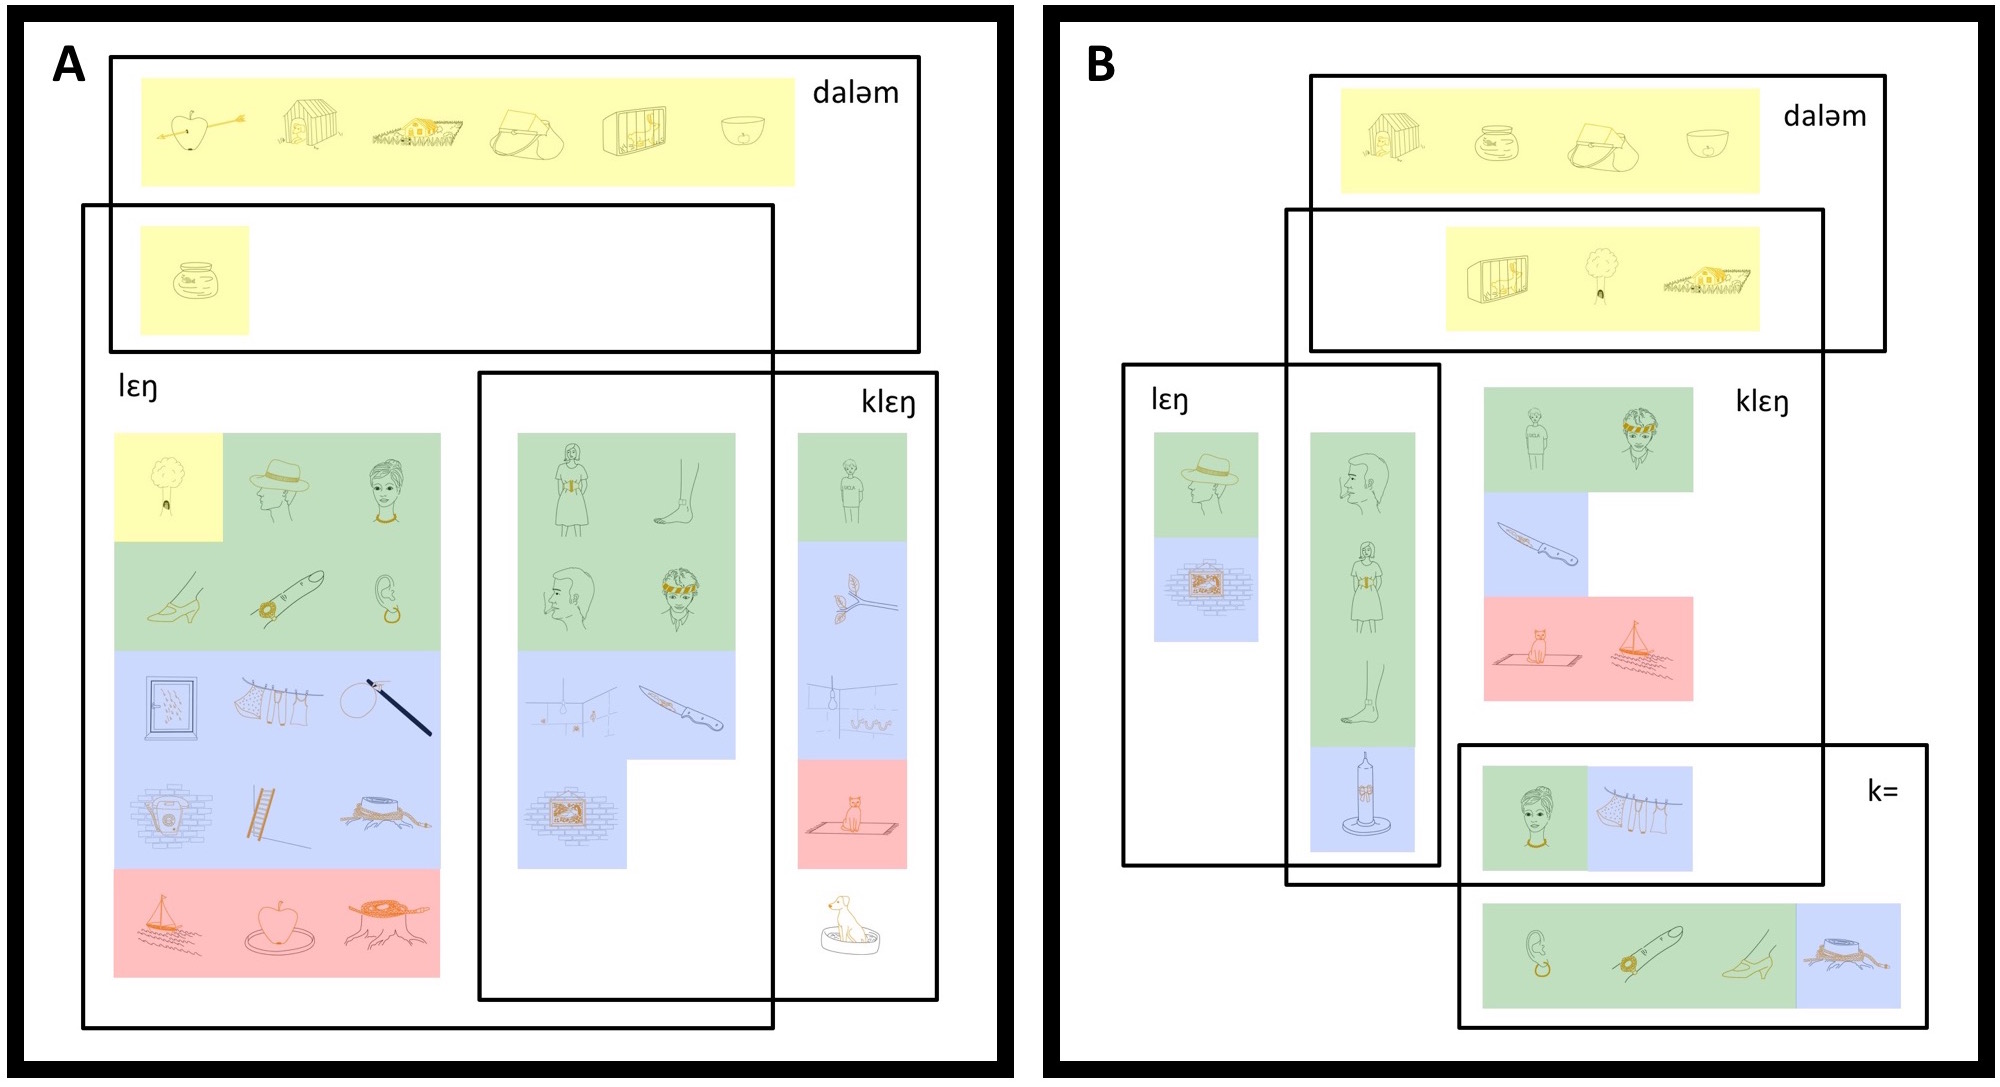


**Figure 3A. Id-Jedek bilinguals’ use of *klɛŋ*, *lɛŋ* and *daləm* in Jedek.**

**Figure 3B. Id-Jedek bilinguals’ use of *klɛŋ*, *lɛŋ*, *daləm* and *k=* in Jahai.** Yellow=containment scenes; green=body-part-as-Ground scenes; blue=attachment scenes; red=superjacent scenes. Lines indicate scenes labeled with a TRM by more than 33% of speakers.

**
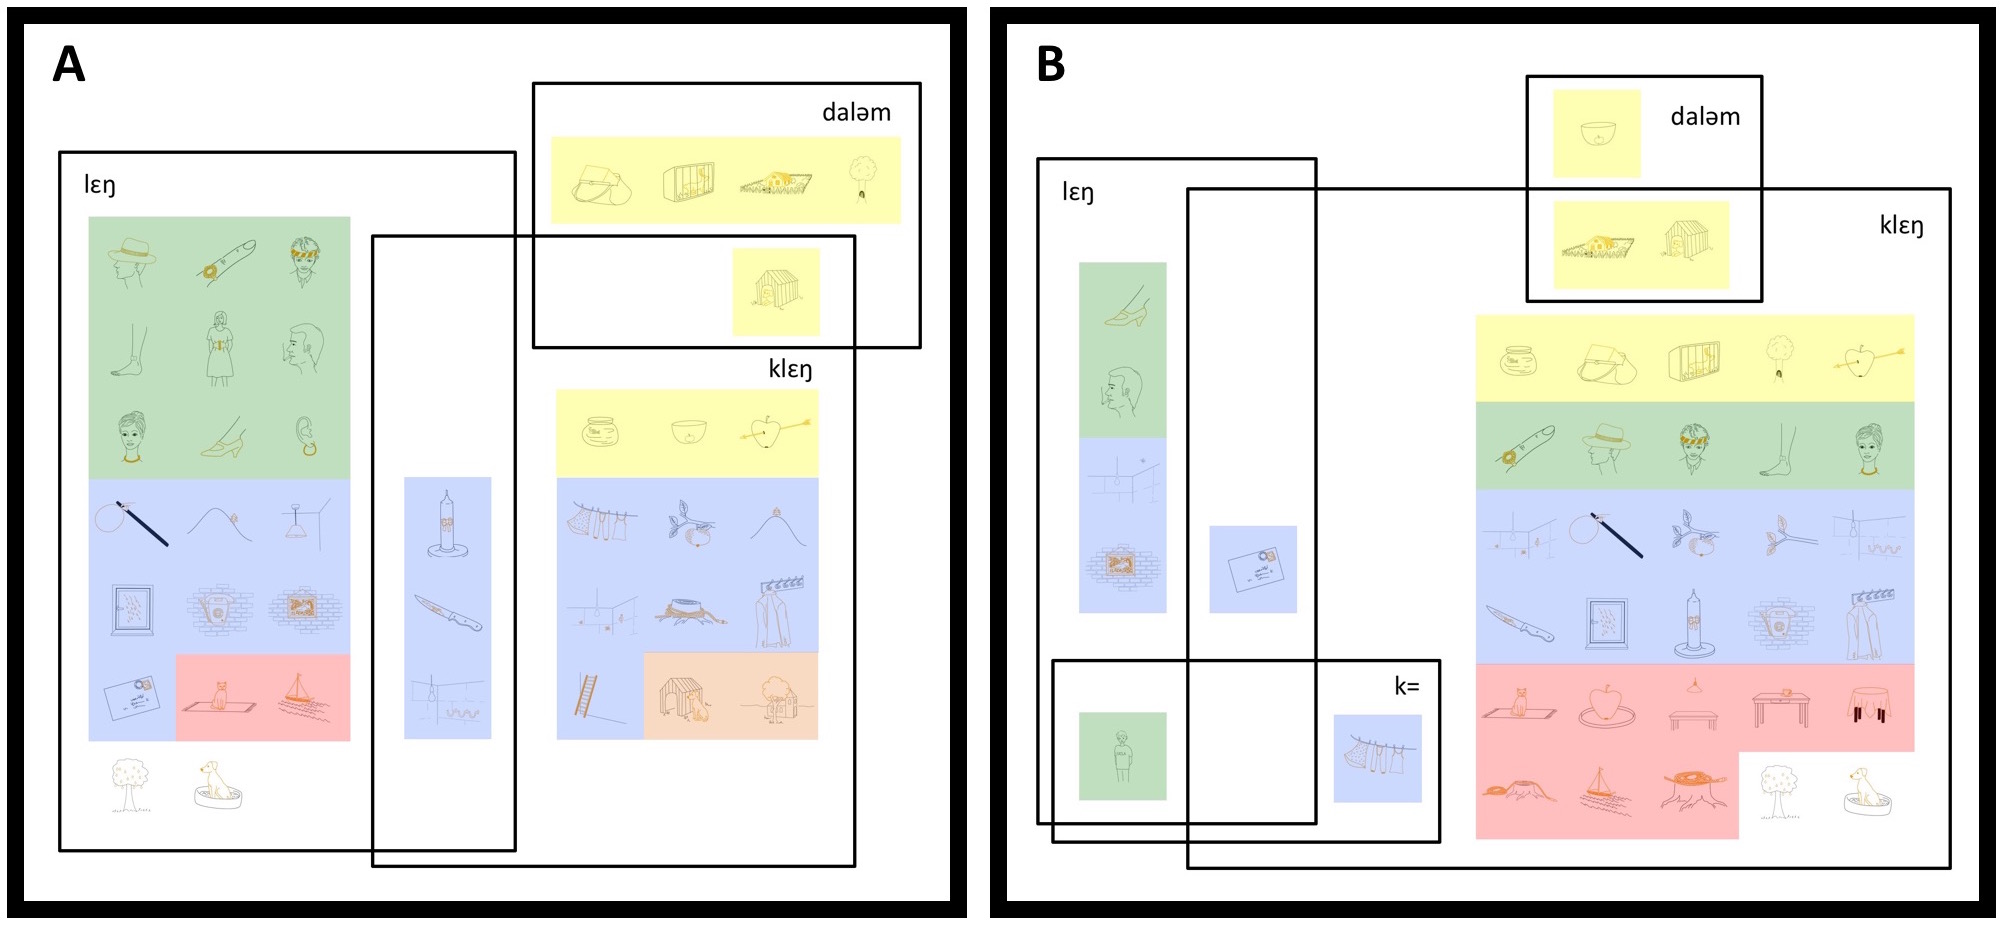
**

**Figure 4A. Id-Jahai bilinguals’ use of *klɛŋ*, *lɛŋ* and *daləm* in Jedek.**

**Figure 4B. Id-Jahai bilinguals’ use of *klɛŋ*, *lɛŋ*, *daləm* and *k=* in Jahai.** Yellow=containment scenes; green=body-part-as-Ground scenes; blue=attachment scenes; red=superjacent scenes; orange=adjacent scenes. Lines indicate scenes labeled with a TRM by more than 33% of speakers.


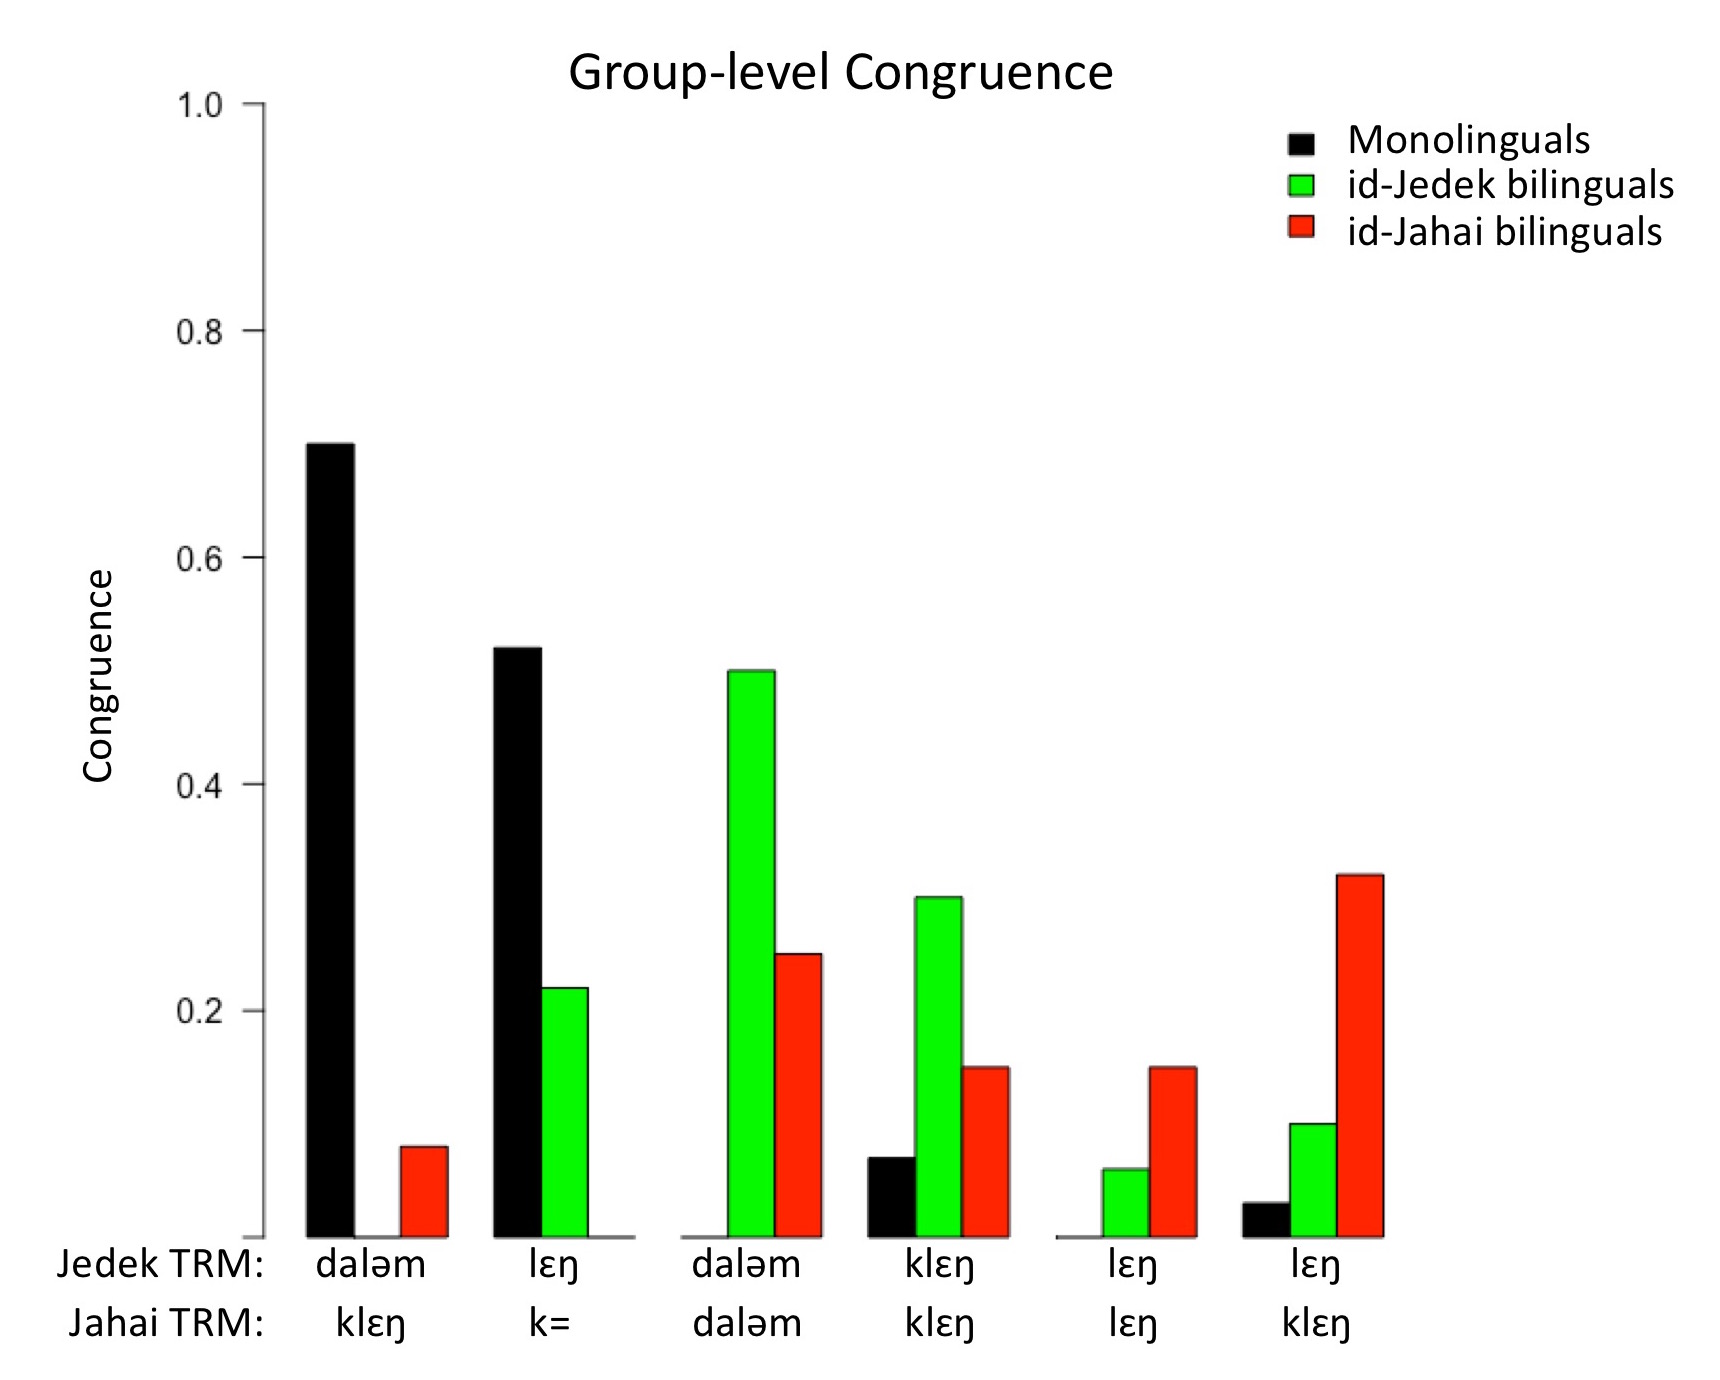


**Figure 5. Group-level congruence of TRM pairs for the three groups.**


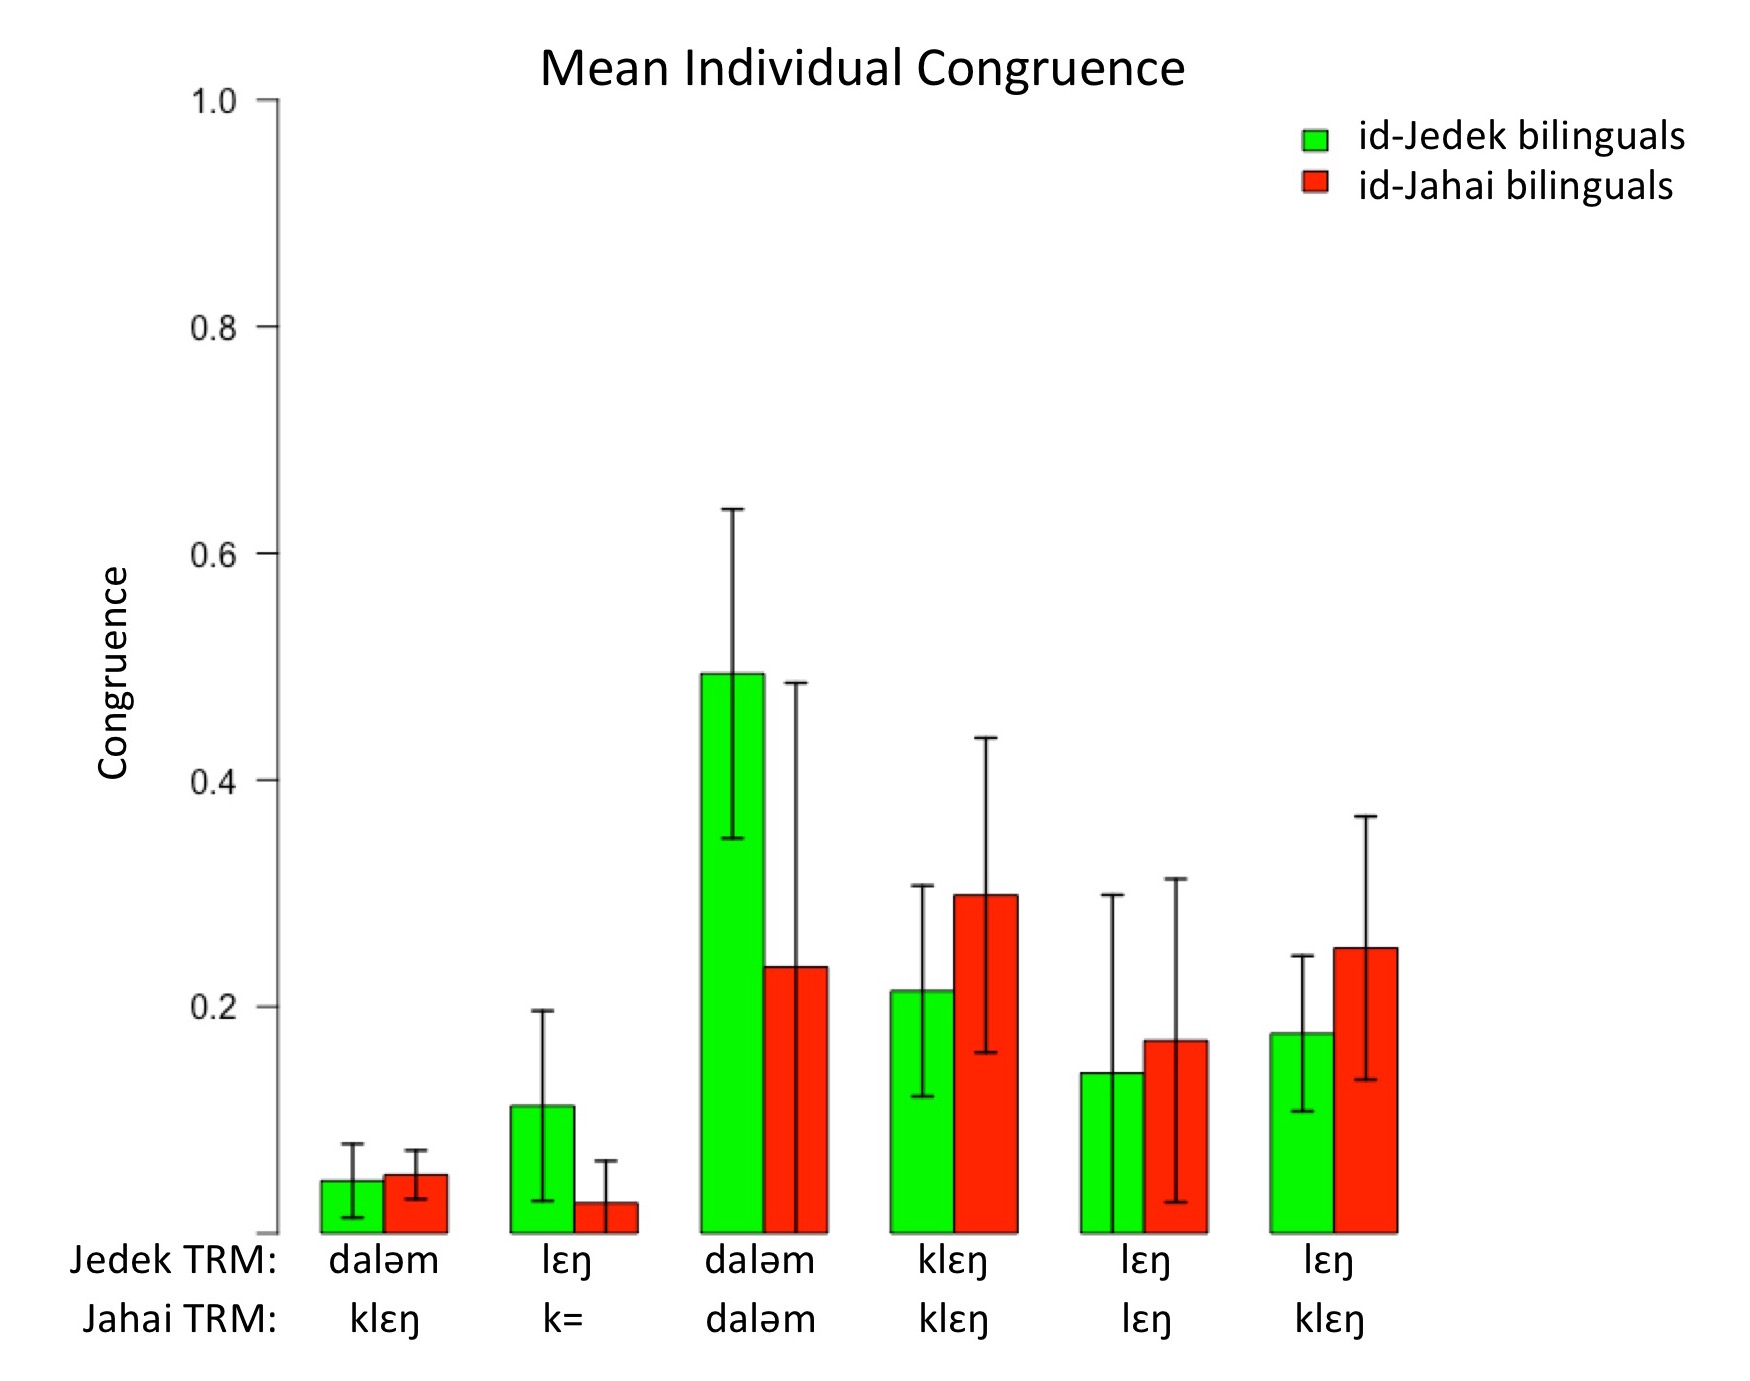


**Figure 6. Mean individual congruence of TRM pairs for the two bilingual groups.**
